# Supplementary material for: Ethanol Production from Wheat Straw Hydrolysate by Issatchenkia Orientalis Isolated from Waste Cooking Oil
Source: MDPI journal article supplement (doi:10.3390/jof7020121), 2021-02-06
Supplement: s1 [file s1]

**Supplementary Table S1. Composition of WSHL**

|                            | <b>Glucose<br/>(g L<sup>-1</sup>)</b> | <b>Xylose<br/>(g L<sup>-1</sup>)</b> | <b>Acetic Acid<br/>(g L<sup>-1</sup>)</b> | <b>Formic acid<br/>(g L<sup>-1</sup>)</b> | <b>HMF<br/>(g L<sup>-1</sup>)</b> | <b>Furfural<br/>(g L<sup>-1</sup>)</b> |
|----------------------------|---------------------------------------|--------------------------------------|-------------------------------------------|-------------------------------------------|-----------------------------------|----------------------------------------|
| <b>WSHL<br/>(bottle 1)</b> | 22.1                                  | 9.9                                  | 2.0                                       | 0.19                                      | 0.14                              | 0.05                                   |
| <b>WSHL<br/>(bottle 2)</b> | 22.1                                  | 10.0                                 | 1.8                                       | 0.15                                      | 0.14                              | 0.04                                   |
