# Supplementary material for: Ethanol Production from Wheat Straw Hydrolysate by Issatchenkia Orientalis Isolated from Waste Cooking Oil
Source: MDPI journal article supplement (doi:10.3390/jof7020121), 2021-02-06
Supplement: s1 [file s1]

## Supplementary Figure S1

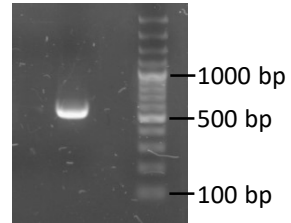

**Supplementary Figure S1: PCR-amplified fragment covering ITS1, 5.8S and ITS2 region**

The 550 bp fragment was obtained by amplification of the WCO-isolated strains' isolated gDNA with ITS4 and ITS5 primers. The PCR reaction was run on 1 % agarose gel ( mV mA 20 min.)
