# Supplementary material for: Ethanol Production from Wheat Straw Hydrolysate by Issatchenkia Orientalis Isolated from Waste Cooking Oil
Source: MDPI journal article supplement (doi:10.3390/jof7020121), 2021-02-06
Supplement: s1 [file s1]

## Supplementary Figure S2

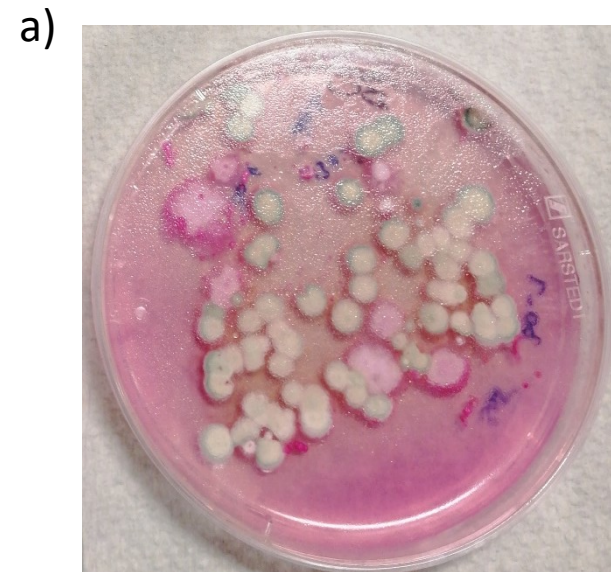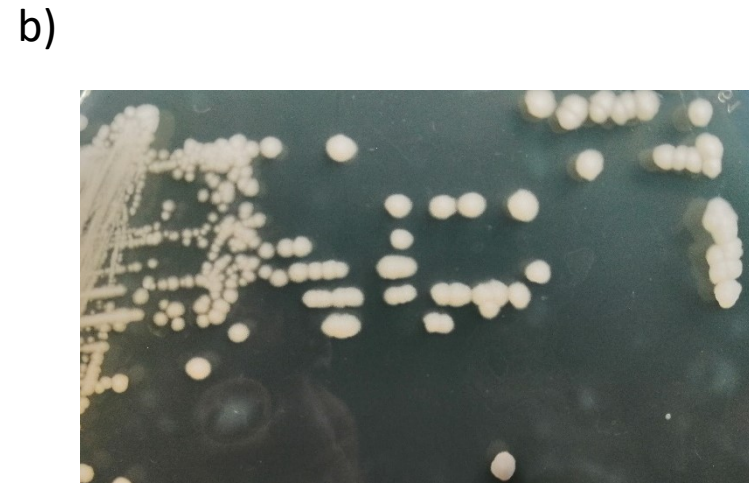

**Supplementary Figure S2:** Photographic images of isolated microorganisms. a) original agar plate with WCO sample plated on RBC before isolation of single colonies, and b) pure culture of the WCO-isolated *I.orientalis* KJ27-7.
