# Supplementary material for: Ethanol Production from Wheat Straw Hydrolysate by Issatchenkia Orientalis Isolated from Waste Cooking Oil
Source: MDPI journal article supplement (doi:10.3390/jof7020121), 2021-02-06
Supplement: s1 [file s1]

Supplementary Figure S4

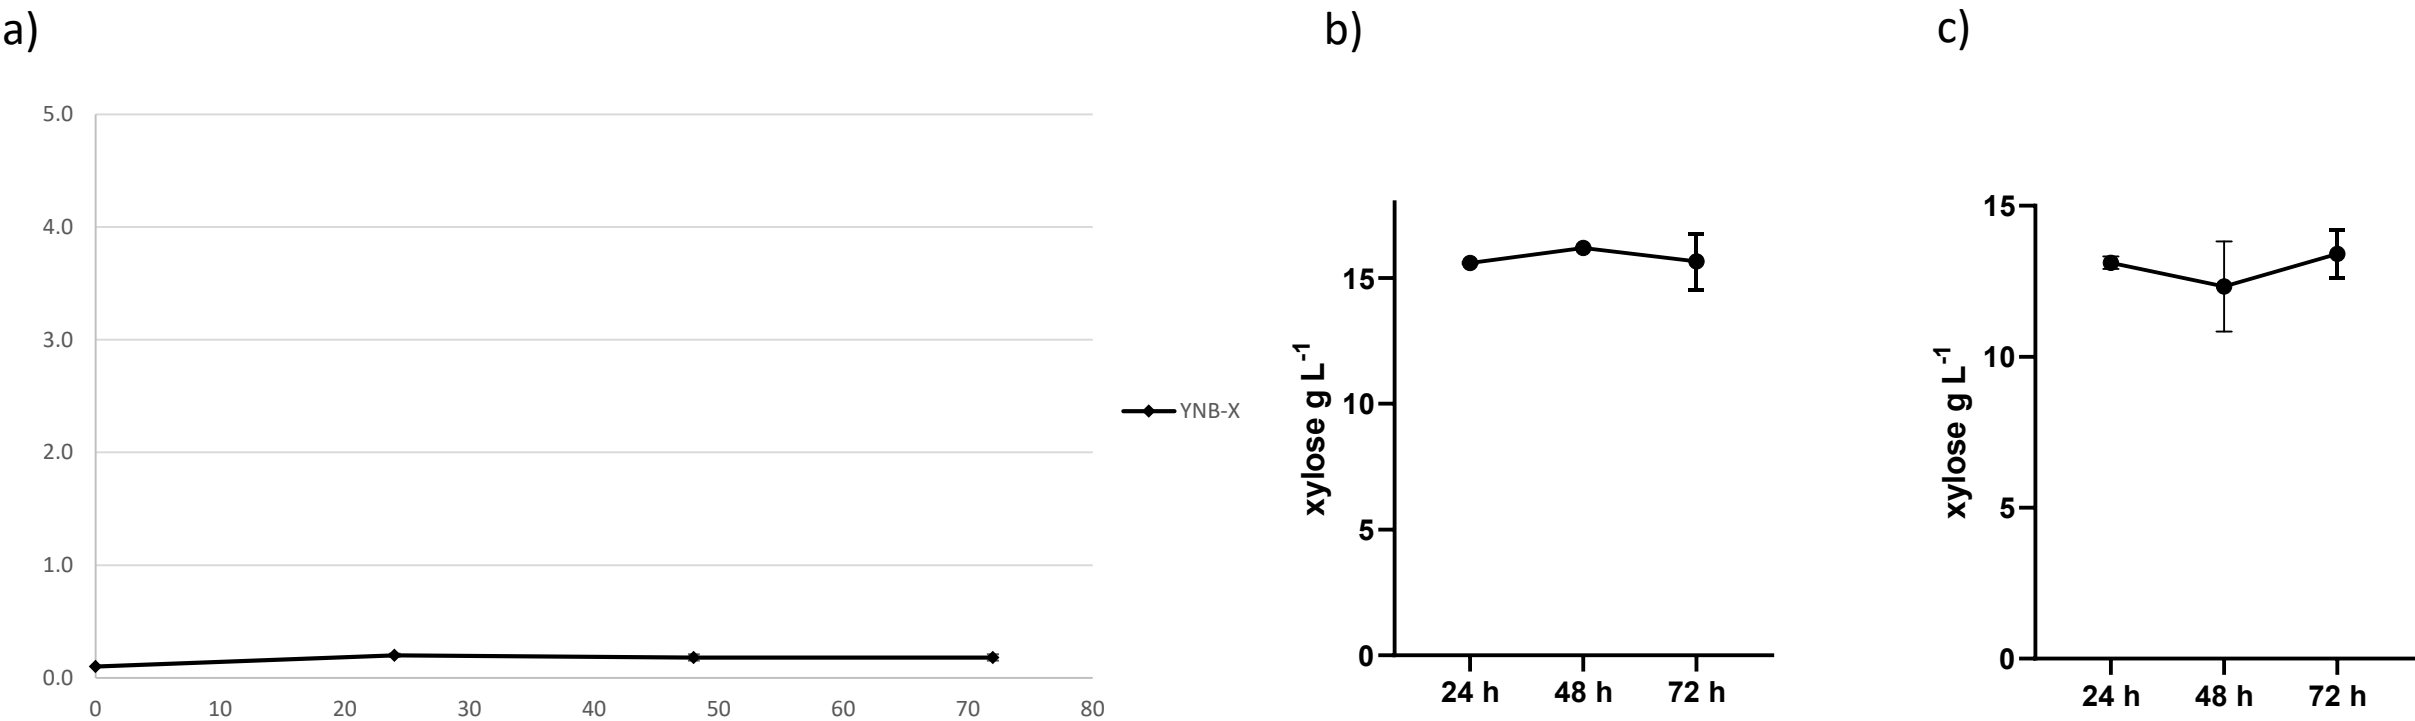

**Supplementary Figure S4:** Growth on xylose and utilization of xylose by *I. orientalis* KJ27-7. a) OD<sub>600</sub> of *I. orientalis* KJ27-7 in YNB media with 15 g L<sup>-1</sup> xylose, measured after 24, 48 and 72 h, and utilization of xylose by *I. orientalis* KJ27-7 as determined by HPLC in YNB media containing b) 15 g L<sup>-1</sup> xylose and c) 20 g L<sup>-1</sup> glucose and 13 g L<sup>-1</sup> xylose as carbon sources.
