# Supplementary material for: Ethanol Production from Wheat Straw Hydrolysate by Issatchenkia Orientalis Isolated from Waste Cooking Oil
Source: MDPI journal article supplement (doi:10.3390/jof7020121), 2021-02-06
Supplement: s1 [file s1]

## Supplementary Figure S3

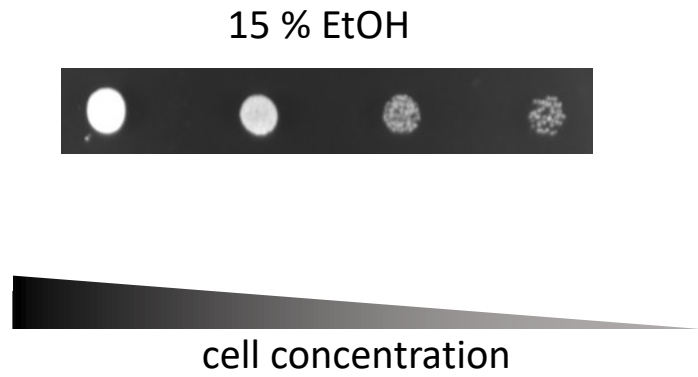

**Supplementary Figure S3:** Spot drop test on 15 % ethanol incubated one day longer. Serial dilutions (1:10, 1:100, 1:1000 and 1:10000) of an *I. orientalis* KJ27-7 cell suspension (10<sup>8</sup> cells per ml) were spotted on YNB agar plates containing 20 g L<sup>-1</sup> glucose and 15 % ethanol (EtOH). Image was taken after 72 h incubation. A representative image of one out of two experiments performed in quadruplicates is shown.
